# Supplementary material
Source: PubMed Central journal article supplement (PMC5741509)
Supplement: NIHMS911177-supplement.pdf [file NIHMS911177-supplement.pdf]

## **SUPPLEMENTAL INFORMATION**

### **Synthetic Three-Component HIV-1 V3 Glycopeptide Immunogens Induce Glycan-Dependent Antibody Responses**

Hui Cai,<sup>a</sup> Jared Orwenyo,<sup>a</sup> John Giddens,<sup>a</sup> Qiang Yang,<sup>a</sup> Roushu Zhang,<sup>a</sup> Celia C. LaBranche,<sup>b</sup> David C. Montefiori,<sup>b</sup> and Lai-Xi Wang<sup>a,\*</sup>

<sup>a</sup> Department of Chemistry and Biochemistry, University of Maryland, College Park, Maryland 20742, USA

<sup>b</sup> Department of Surgery, Duke University, Durham, North Carolina 27705, USA

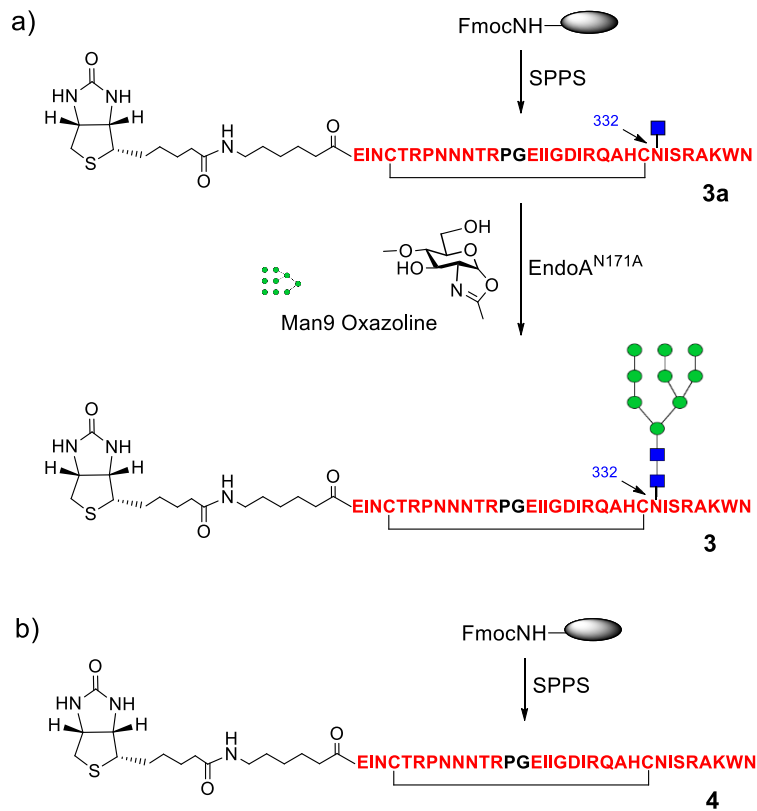

Figure S1, related to Figure 1: Synthesis of 33-mer V3 peptides. a) Chemoenzymatic synthesis of 33-mer V3 high-mannose glycopeptide **3**. b) SPPS Synthesis of 33-mer V3 peptide **4**.

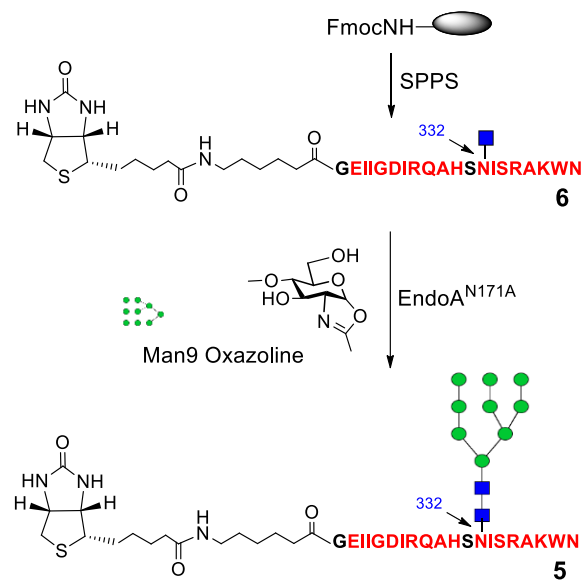

Figure S2, related to Figure 1: Chemoenzymatic synthesis of 20-mer V3 high-mannose glycopeptide **5** and GlcNAc peptide **6**.

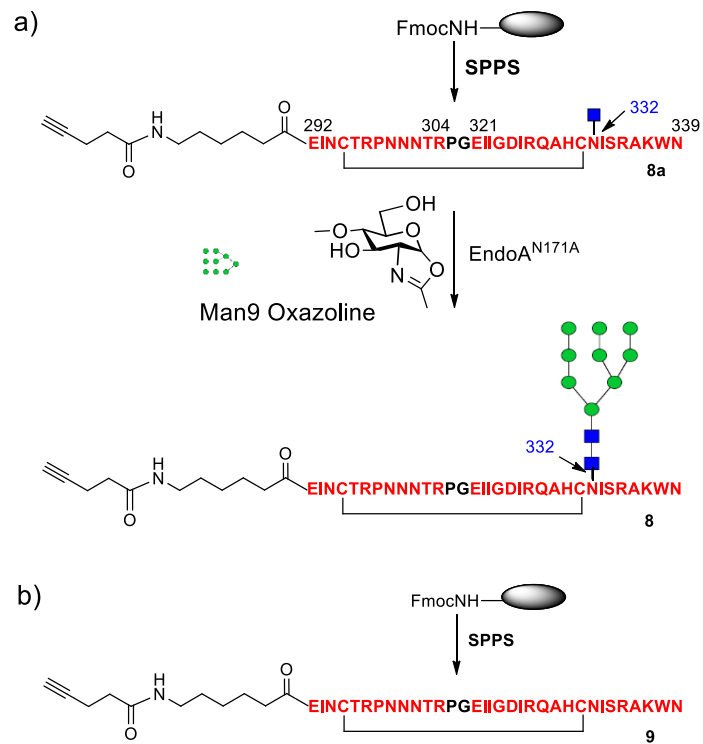

Figure S3, related to Figure 3: Synthesis of alkyne V3 glycopeptide and peptide. a) Chemoenzymatic synthesis of 33-mer V3 high-mannose glycopeptide **8** carrying an alkyne moiety. b) Synthesis of 33-mer V3 peptide **9** carrying an alkyne moiety.

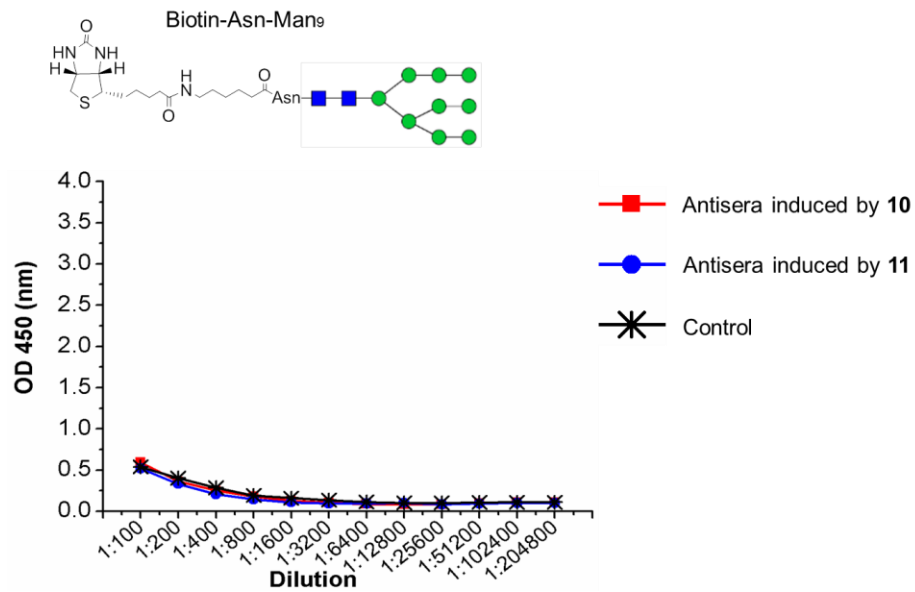

Figure S4, related to Figure 6: ELISA binding of the antisera induced by **10** and **11** to the biotin-labeled high-mannose type N-glycan (Man<sub>9</sub>GlcNAc<sub>2</sub>-Asn).
